# Supplementary material for: Next-Generation Sequencing Characterizes the Landscape of Somatic Mutations and Pathways in Metastatic Bile Tract Carcinoma
Source: Hindawi journal article supplement (doi:10.1155/2020/3275315), 2020-09-04
Supplement: f1 [file 3275315.f1.zip]

**Altered in 47 (92.16%) of 51 samples.**

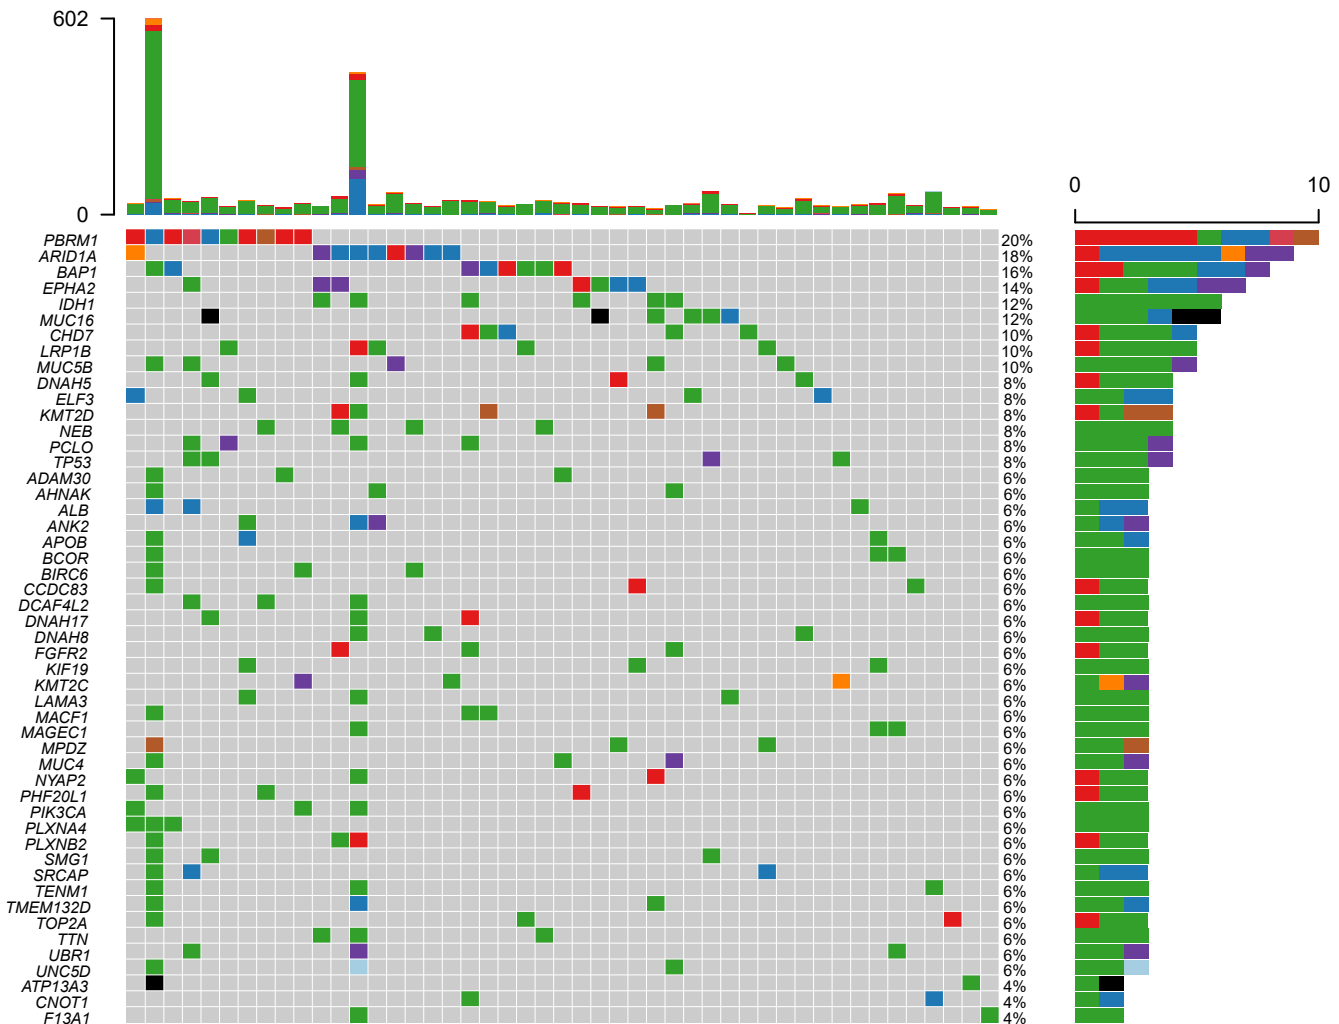

- Nonsense\_Mutation    ■ Frame\_Shift\_Ins  
■ Missense\_Mutation    ■ In\_Frame\_Del  
■ Frame\_Shift\_Del    ■ Nonstop\_Mutation  
■ In\_Frame\_Ins    ■ Multi\_Hit  
■ Splice\_Site
