# Supplementary material for: Next-Generation Sequencing Characterizes the Landscape of Somatic Mutations and Pathways in Metastatic Bile Tract Carcinoma
Source: J Oncol. 2020 Sep 4;2020:3275315. doi: 10.1155/2020/3275315 (PMC7487098; doi:10.1155/2020/3275315)
Supplement: Supplementary Materials — Supplementary figure 1: mutational landscape of somatic alterations in TCGA-CHOL database. Supplementary figure 2: Kaplan–Meier survival analysis using the log-rank test (mantel-cox test) for comparing the differences between mutant TP53 and wild-type TP53 genes. Supplementary Table 1: patient clinical information. Supplementary Table 2: NGS results of our cohort. Support files legends. Supplementary table a: variant allele frequency (VAF) of 556 genes in target sequencing data and WES data. Supplementary table b: 556 somatic mutant genes were divided into TCGA-CHOL recognized genes and unrecognized genes in this study. Supplementary table c: mutation screening of 44 transferred genes in the TCGA-CHOL dataset. Supplementary table d: list of genes involved in 556 genes panel sequencing in this study. Supplementary table e: the list of genes related to the pathways in the three clusters. Supplementary figure a: Go-CC pathway of transferred genes in TCGA database. [file 3275315.f1.zip › 3275315.f1/Supplementary table d. List of genes involved in 556 genes panel sequencing in this study..xlsx]

## Sheet: Sheet1
Hugo_Symbol
ABCB1
ABL1
ABRAXAS1
ACVR1
ACVR1B
AGO2
AKT1
AKT2
AKT3
ALK
ALOX12B
AMER1
ANKRD11
APC
AR
ARAF
ARFRP1
ARID1A
ARID1B
ARID2
ARID5B
ASXL1
ASXL2
ATM
ATR
ATRX
AURKA
AURKB
AXIN1
AXIN2
AXL
B2M
BABAM1
BAP1
BARD1
BBC3
BCL10
BCL2
BCL2L1
BCL2L11
BCL6
BCOR
BCORL1
BCR
BIRC3
BLM
BMPR1A
BRAF
BRCA1
BRCA2
BRD4
BRIP1
BTG1
BTG2
BTK
CALR
CARD11
CARM1
CASP8
CBFB
CBL
CCND1
CCND2
CCND3
CCNE1
CCNQ
CD22
CD274
CD276
CD70
CD74
CD79A
CD79B
CDA
CDC42
CDC73
CDH1
CDK12
CDK4
CDK6
CDK8
CDKN1A
CDKN1B
CDKN2A
CDKN2B
CDKN2C
CEBPA
CENPA
CEP72
CFTR
CHEK1
CHEK2
CIC
CREBBP
CRKL
CRLF2
CSDE1
CSF1R
CSF3R
CTCF
CTLA4
CTNNA1
CTNNB1
CUL3
CUL4A
CXCR4
CYLD
CYP17A1
CYP19A1
CYP1B1
CYP2C8
CYP2D
CYP2D6
CYSLTR2
DAXX
DCUN1D1
DDR1
DDR2
DICER1
DIS3
DLL3
DNAJB1
DNMT1
DNMT3A
DNMT3B
DOT1L
DPYD
DROSHA
DUSP4
DYNC2H1
E2F3
EED
EGFL7
EGFR
EIF1AX
EIF4A2
EIF4E
ELF3
ELOC
EMSY
EP300
EPAS1
EPCAM
EPHA3
EPHA5
EPHA7
EPHB1
EPHB4
ERBB2
ERBB3
ERBB4
ERCC1
ERCC2
ERCC3
ERCC4
ERCC5
ERF
ERG
ERRFI1
ESR1
ETV1
ETV4
ETV5
ETV6
EWSR1
EZH1
EZH2
EZR
FAM46C
FANCA
FANCC
FANCG
FANCL
FAS
FAT1
FBXW7
FGF10
FGF12
FGF14
FGF19
FGF23
FGF3
FGF4
FGF6
FGFR1
FGFR2
FGFR3
FGFR4
FH
FLCN
FLT1
FLT3
FLT4
FOXA1
FOXL2
FOXO1
FOXP1
FUBP1
FYN
GABRA6
GATA1
GATA2
GATA3
GATA4
GATA6
GID4
GLI1
GNA11
GNA13
GNAQ
GNAS
GPS2
GREM1
GRIN2A
GRM3
GSK3B
GSTM1
GSTP1
GSTT1
H3F3A
H3F3B
H3F3C
HDAC1
HGF
HIST1H1C
HIST1H2BD
HIST1H3A
HIST1H3B
HIST1H3C
HIST1H3D
HIST1H3E
HIST1H3F
HIST1H3G
HIST1H3H
HIST1H3I
HIST1H3J
HIST2H3C
HIST2H3D
HIST3H3
HLA-A
HLA-B
HLA-C
HLA-DMA
HLA-DMB
HLA-DOA
HLA-DOB
HLA-DPA1
HLA-DPB1
HLA-DPB2
HLA-DQA1
HLA-DQA2
HLA-DQB1
HLA-DQB2
HLA-DRA
HLA-DRB1
HLA-DRB5
HLA-DRB6
HLA-DRB9
HNF1A
HOXB13
HRAS
HSD3B1
ICOSLG
ID3
IDH1
IDH2
IFNGR1
IGF1
IGF1R
IGF2
IKBKE
IKZF1
IL10
IL7R
INHA
INHBA
INPP4A
INPP4B
INPPL1
INSR
IRF2
IRF4
IRS1
IRS2
JAK1
JAK2
JAK3
JUN
KDM5A
KDM5C
KDM6A
KDR
KEAP1
KEL
KIT
KLF4
KLHL6
KMT2A
KMT2B
KMT2C
KMT2D
KMT5A
KNSTRN
KRAS
LATS1
LATS2
LMO1
LRP1B
LTK
LYN
MAF
MALT1
MAP2K1
MAP2K2
MAP2K4
MAP3K1
MAP3K13
MAP3K14
MAP4K4
MAPK1
MAPK3
MAPKAP1
MAX
MCL1
MDC1
MDM2
MDM4
MED12
MEF2B
MEN1
MERTK
MET
MGA
MITF
MKNK1
MLH1
MPL
MRE11
MSH2
MSH3
MSH6
MSI1
MSI2
MST1
MST1R
MTAP
MTHFR
MTOR
MUTYH
MYB
MYC
MYCL
MYCN
MYD88
MYOD1
NBN
NCOA3
NCOR1
NEGR1
NF1
NF2
NFE2L2
NFKBIA
NKX2-1
NKX3-1
NOTCH1
NOTCH2
NOTCH3
NOTCH4
NPM1
NQO1
NRAS
NRG1
NSD1
NSD2
NSD3
NT5C2
NTHL1
NTRK1
NTRK2
NTRK3
NUDT15
NUF2
NUP93
NUTM1
P2RY8
PAK1
PAK5
PALB2
PARP1
PARP2
PARP3
PAX5
PAX8
PBRM1
PDCD1
PDCD1LG2
PDGFRA
PDGFRB
PDK1
PDPK1
PGR
PHOX2B
PIK3C2B
PIK3C2G
PIK3C3
PIK3CA
PIK3CB
PIK3CD
PIK3CG
PIK3R1
PIK3R2
PIK3R3
PIM1
PLCG2
PLK2
PMAIP1
PMS1
PMS2
PNRC1
POLD1
POLE
PON1
PPARG
PPM1D
PPP2R1A
PPP2R2A
PPP4R2
PPP6C
PRDM1
PRDM14
PREX2
PRKAR1A
PRKCI
PRKD1
PRKN
PTCH1
PTEN
PTP4A1
PTPN11
PTPRD
PTPRS
PTPRT
QKI
RAB35
RAC1
RAC2
RAD21
RAD50
RAD51
RAD51B
RAD51C
RAD51D
RAD52
RAD54L
RAF1
RARA
RASA1
RB1
RBM10
RECQL4
REL
RET
RFWD2
RHEB
RHOA
RICTOR
RIT1
RNF43
ROS1
RPS6KA4
RPS6KB2
RPTOR
RRAGC
RRAS2
RRM1
RSPO2
RTEL1
RUNX1
RXRA
RYBP
SDC4
SDHA
SDHAF2
SDHB
SDHC
SDHD
SESN1
SESN2
SESN3
SETD2
SF3B1
SGK1
SH2B3
SH2D1A
SHOC2
SHQ1
SLC34A2
SLCO1B1
SLX4
SMAD2
SMAD3
SMAD4
SMARCA4
SMARCB1
SMARCD1
SMO
SMYD3
SNCAIP
SOCS1
SOD2
SOS1
SOX17
SOX2
SOX9
SPEN
SPOP
SPRED1
SRC
SRSF2
STAG2
STAT3
STAT5A
STAT5B
STK11
STK19
STK40
SUFU
SUZ12
SYK
TAP1
TAP2
TBX3
TCF3
TCF7L2
TEK
TEKT4
TERC
TERT
TET1
TET2
TGFBR1
TGFBR2
TIPARP
TMEM127
TMPRSS2
TNFAIP3
TNFRSF14
TOP1
TP53
TP53BP1
TP63
TPMT
TRAF2
TRAF7
TSC1
TSC2
TSHR
TYMS
TYRO3
U2AF1
UGT1A1
UMPS
UPF1
VEGFA
VHL
VTCN1
WT1
WWTR1
XIAP
XPC
XPO1
XRCC1
XRCC2
YAP1
ZFHX3
ZNF217
ZNF423
ZNF703
