# Supplementary material for: Next-Generation Sequencing Characterizes the Landscape of Somatic Mutations and Pathways in Metastatic Bile Tract Carcinoma
Source: J Oncol. 2020 Sep 4;2020:3275315. doi: 10.1155/2020/3275315 (PMC7487098; doi:10.1155/2020/3275315)
Supplement: Supplementary Materials — Supplementary figure 1: mutational landscape of somatic alterations in TCGA-CHOL database. Supplementary figure 2: Kaplan–Meier survival analysis using the log-rank test (mantel-cox test) for comparing the differences between mutant TP53 and wild-type TP53 genes. Supplementary Table 1: patient clinical information. Supplementary Table 2: NGS results of our cohort. Support files legends. Supplementary table a: variant allele frequency (VAF) of 556 genes in target sequencing data and WES data. Supplementary table b: 556 somatic mutant genes were divided into TCGA-CHOL recognized genes and unrecognized genes in this study. Supplementary table c: mutation screening of 44 transferred genes in the TCGA-CHOL dataset. Supplementary table d: list of genes involved in 556 genes panel sequencing in this study. Supplementary table e: the list of genes related to the pathways in the three clusters. Supplementary figure a: Go-CC pathway of transferred genes in TCGA database. [file 3275315.f1.zip › 3275315.f1/Supplementary table e. . The list of genes related to the pathways in the three clusters..xlsx]

## Sheet: Metastasis cluster
Hugo_Symbol
KMT2A
HNF1A
EPHB4
PRDM1
GID4
IRS1
PRKD1
AGO2
FGFR2
TSHR
ARAF
NTHL1
LTK
MSH3
XPO1
ZFHX3
MAP3K14
SYK
MED12
RB1
BBC3
ERCC4
ASXL1
ALK
KLF4
NOTCH1
MTOR
AR
ZNF703
ARID1A
MAPK3
SPEN
FGFR4
ERG
LATS2
SMARCA4
EGFL7
TET2
INPPL1
AKT2
PIK3CG
KDM5C
BCORL1
GNAS

## Sheet: Non-metastasis cluster
Hugo_Symbol
SOX17
SNCAIP
MDM4
MAP2K2
KMT2B
TP53BP1
AXIN1
PIK3CA
DNMT3B
FANCA
POLE
RHOA
XRCC2
IRS2
PBRM1
RECQL
GLI1
EP300
RPS6KA4
CIC
MYCN
ERBB2
SOX2
NTRK1
TRAF7
INPP4B
LOC110117498-PIK3R3
KMT2D
EPHA7
BTK
CTNNB1
EPHA5
ARID2
IDH1
RPTOR
CSF1R
PIK3CD
QKI
CDK6
ERCC1
PPP2R1A
PMS2
KMT2C
CBL
HIST1H3B
EPHA3
HIST1H2BD
RTEL1
POLD1
PLK2

## Sheet: intersection cluster
Hugo_Symbol
PTPRS
GRIN2A
GRM3
LRP1B
DROSHA
TP53
ARID1B
PTCH1
FLT1
