# Supplementary material for: Next-Generation Sequencing Characterizes the Landscape of Somatic Mutations and Pathways in Metastatic Bile Tract Carcinoma
Source: J Oncol. 2020 Sep 4;2020:3275315. doi: 10.1155/2020/3275315 (PMC7487098; doi:10.1155/2020/3275315)
Supplement: Supplementary Materials — Supplementary figure 1: mutational landscape of somatic alterations in TCGA-CHOL database. Supplementary figure 2: Kaplan–Meier survival analysis using the log-rank test (mantel-cox test) for comparing the differences between mutant TP53 and wild-type TP53 genes. Supplementary Table 1: patient clinical information. Supplementary Table 2: NGS results of our cohort. Support files legends. Supplementary table a: variant allele frequency (VAF) of 556 genes in target sequencing data and WES data. Supplementary table b: 556 somatic mutant genes were divided into TCGA-CHOL recognized genes and unrecognized genes in this study. Supplementary table c: mutation screening of 44 transferred genes in the TCGA-CHOL dataset. Supplementary table d: list of genes involved in 556 genes panel sequencing in this study. Supplementary table e: the list of genes related to the pathways in the three clusters. Supplementary figure a: Go-CC pathway of transferred genes in TCGA database. [file 3275315.f1.zip › 3275315.f1/Supplementary Table I.xlsx]

## Sheet: Sheet1
Supplementary table 1 Patient clinical information.
Group	ID	Age	Gender	Clinicopathologic diagnosis	Drinking history	Hepatitis history	Hypertension history	Metastatic sites	TNM	Clinical stages	OS(days)	State
Metastasis group	S01	61	F	CCA	No	No	No	Lymph node	T3N1M0	IIIB	195	dead
	S03	30	M	CCA	Yes	HBV	No	Lung	T2bN0M1	IVB	715	alive
	S04	70	F	CCA	No	No	No	Lymph node	T3N2M0	IIIB	130	dead
	S05	49	M	CCA	No	HBV	No	Retroperitoneum right heart phrenic Angle area lymph node, double lung	T2bN1M1	IVB	167	dead
	S06	55	F	CCA	No	No	Yes	Retroperitoneal lymph node metastasis in the hilar area	T2aN1M1	IVB	443	alive
	S08	54	M	CCA	Yes	HBV	No	Hilar lymph nodes	T4N1M0	IVB	199	dead
	S09	56	F	CCA	No	No	Yes	Hilar lymph nodes	T4N1M0	IVB	360	dead
	S10	61	M	CCA	No	No	Yes	Duodenum, pancreas	T4N0M0	IIA	380	alive
	S14	37	M	GBC	No	HBV	No	Lymph node	T3N2M0	IVB	204	alive
Non-metastasis group	S02	45	F	CCA	No	No	No	/	T1N0M0	I	534	dead
	S07	51	M	cHCC-CC	Yes	HBV	No	/	T1N0M0	I	442	alive
	S11	52	F	CCA	No	No	No	/	T4N0M0	IIIB	8	dead
	S12	69	F	CCA	No	HBV	No	/	T4N0M0	IVA	260	alive
	S13	56	M	CCA	No	HBV	No	/	T4N0M0	IVA	185	dead
CCA, Cholangiocarcinoma; GBC, Gallbladder carcinoma; cHCC-CC, Combined hepatocellular and cholangiocarcinoma.

## Sheet: Sheet4
Supplementary table 1 Patient clinical information.
Group	Metastasis							Non-metastasis
ID	S01	S02	S03	S04	S05	S06	S07	S08	S09	S10	S11	S12
Age	61	30	70	49	55	61	37	45	51	52	69	56
Gender	F	M	F	M	F	M	M	F	M	F	F	M
Clinicopathologic diagnosis	CCA	CCA	HCC	CCA	CCA	CCA	GC	CCA	cHCC-CC	CCA	CCA	CCA
Drinking history	N	Y	N	N	N	N	N	N	Y	N	N	N
Hepatitis history	N	HBV	N	HBV	N	N	HBV	N	HBV	N	HBV	HBV
Hypertension history	N	N	N	N	Y	Y	N	N	N	N	N	N
Metastatic sites	lymph node	lung	lymph node	Retroperitoneum right heart phrenic Angle area lymph node, double lung	Retroperitoneal lymph node metastasis in the hilar area	Duodenum, pancreas	lymph node	/	/	/	/	/
TNM	T3N1M0	T2bN0M1	T3N2M0	T2bN1M1	T2aN1M1	T4N0M0	T3N2M0	T1N0M0	T1N0M0	T4N0M0	T4N0M0	T4N0M0
Clinical stages	IIIB	IVB	IIIB	IVB	IVB	IIA	IVB	I	I	IIIB	IVA	IVA
OS	6m	18m	4m	9m	9m	5m	/	15m	9m	9d	1m	4m
State	dead	alive	dead	alive	alive	alive	/	alive	alive	dead	alive	alive
HCC, Hepatobiliary cell carcinoma; GC, Gallbladder Carcinoma; CC, Cholangiocarcinoma; cHCC-CC, Combined hepatocellular and cholangiocarcinoma.
