# Supplementary figures and images for: Next-Generation Sequencing Characterizes the Landscape of Somatic Mutations and Pathways in Metastatic Bile Tract Carcinoma
Source: Hindawi journal article supplement (doi:10.1155/2020/3275315), 2020-09-04

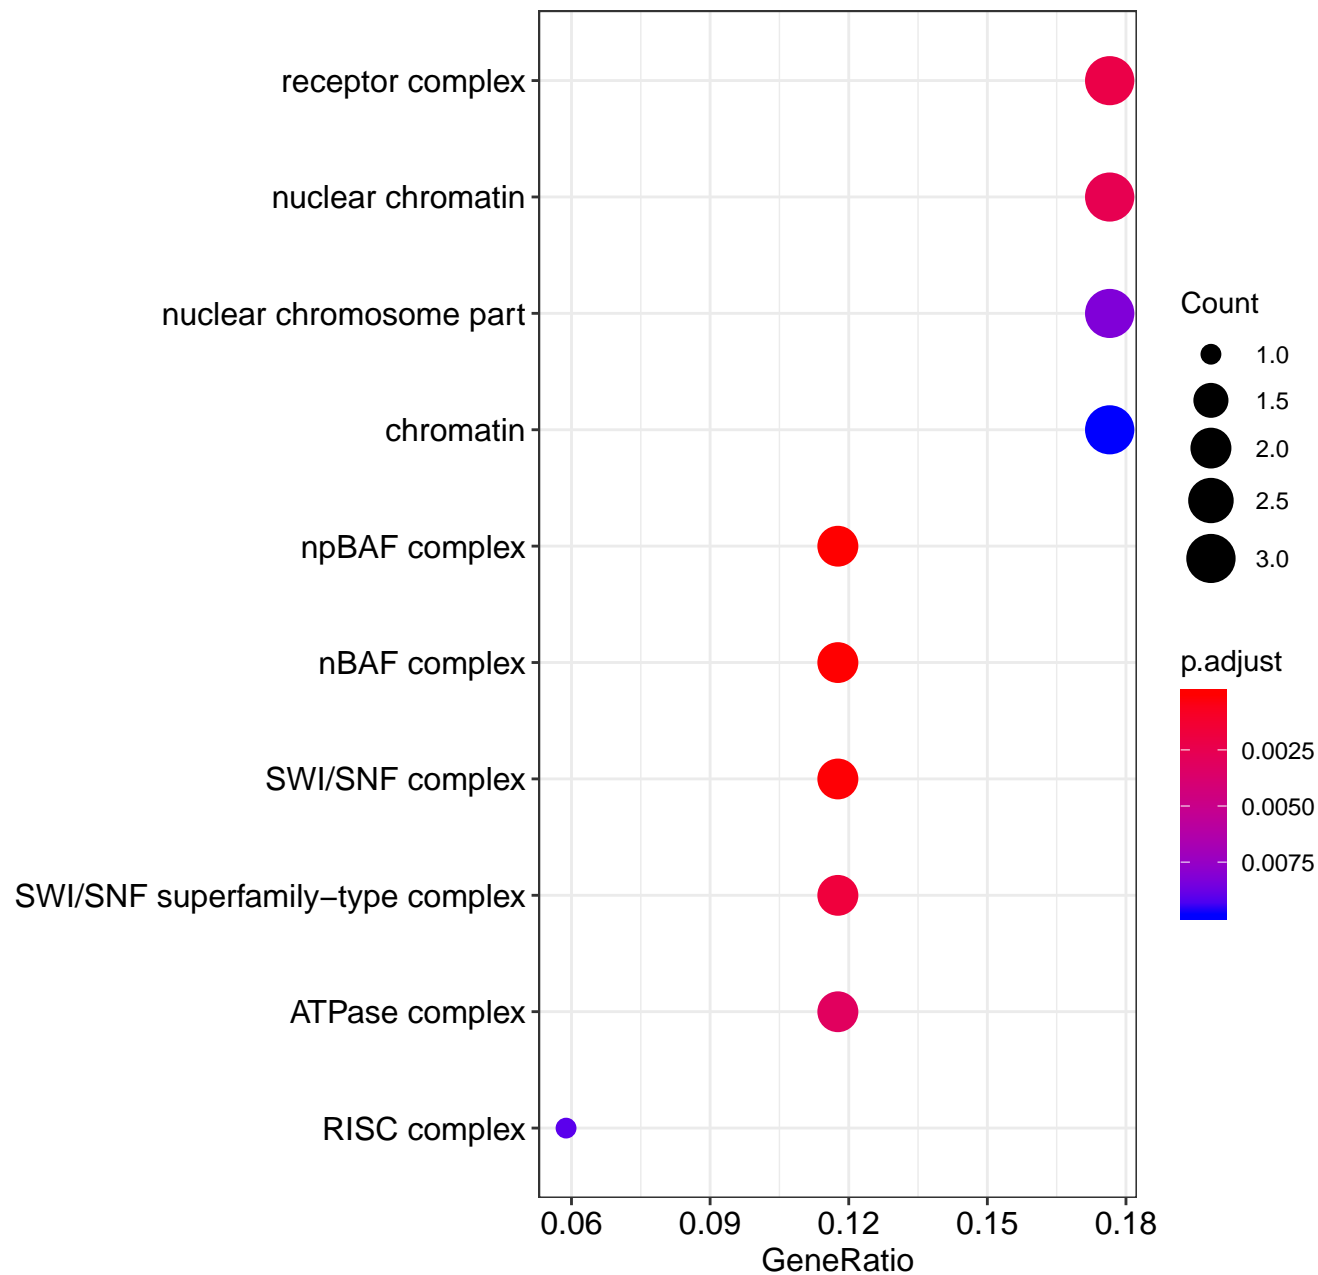

Supplement: f1 [file 3275315.f1.zip]

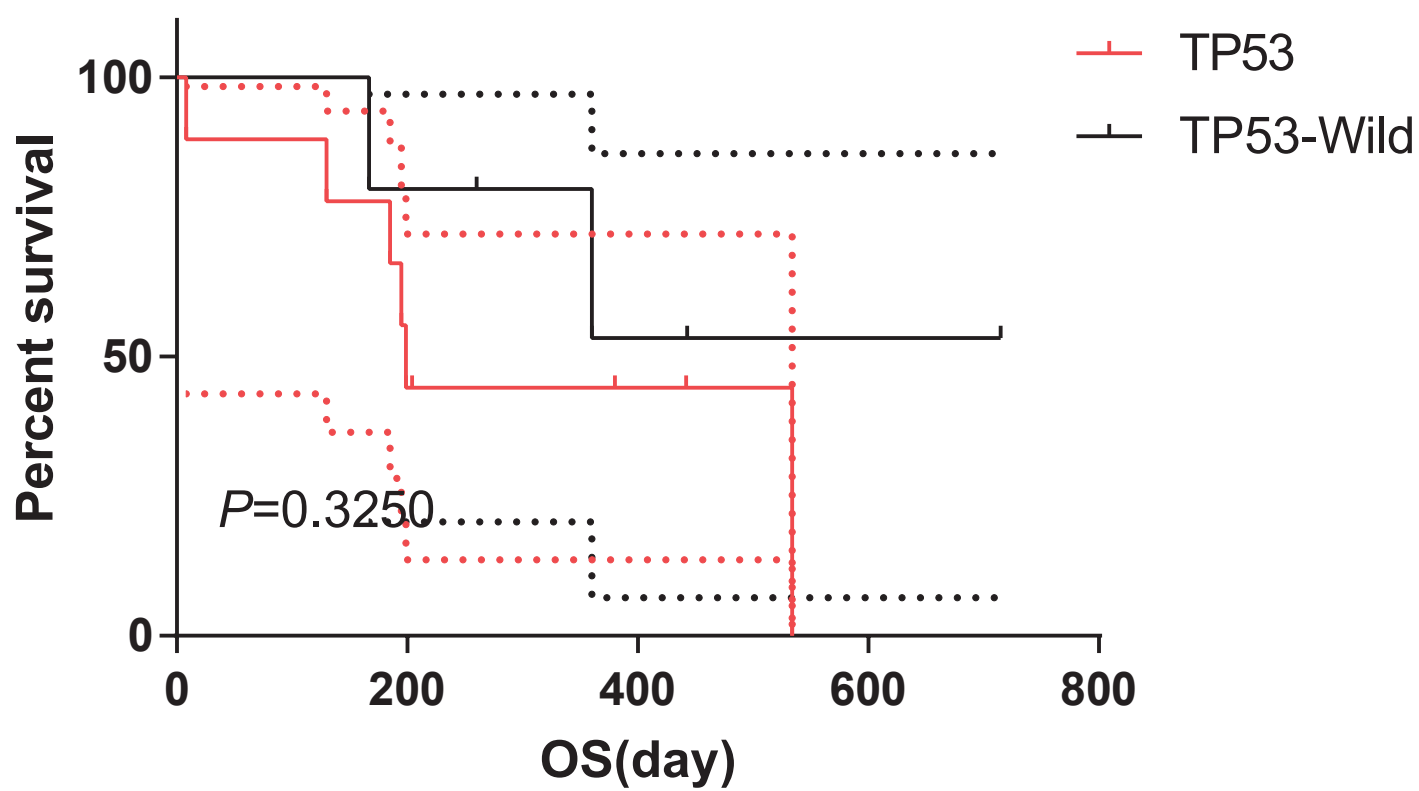

Supplement: f1 [file 3275315.f1.zip]
